# Supplementary material
Source: Royal Society of Chemistry journal article supplement (doi:10.1039/d5nj03901k)
Supplement: d5nj03901k1.pdf [file d5nj03901k1.pdf]

## Supporting Information

### Facile Synthesis of Ni/NiO Composite with Superior Bifunctional Electrocatalytic Activity for Water Electrolysis Under Wide Range of pH

Alka Rani<sup>[a]</sup>, Rathindranath Biswas<sup>[b]</sup>, Ayan Roy<sup>[c]</sup>, Arnab Dutta<sup>[b]</sup>, Harjinder Singh<sup>[a],\*</sup>

<sup>[a]</sup>Department of Chemistry, Maulana Azad National Institute of Technology, Bhopal-462003, Madhya Pradesh, India.

<sup>[b]</sup>Chemistry Department Indian Institute of Technology Bombay, Mumbai 400076, Maharashtra, India.

<sup>[c]</sup>Department of Pure and Applied Physics, Guru Ghasidas Vishwavidyalaya (CU), Koni, Bilaspur 495009, India.

Email of corresponding author: harjinder@manit.ac.in

| Sl. No. | Figure/ Table No.                | Title                                                                                                                                   | Page No. |
|---------|----------------------------------|-----------------------------------------------------------------------------------------------------------------------------------------|----------|
| 1.      |                                  | Mechanism of HER and OER                                                                                                                | S3       |
| 2.      | <b>Scheme S1 &amp; Scheme S2</b> | Mechanism of HER in acidic and alkaline medium & Mechanism of OER in acidic and alkaline medium                                         | S3       |
| 3.      |                                  | Characterisation                                                                                                                        | S4-S5    |
| 4.      | <b>Table S1</b>                  | Structural parameters of Ni/NiO heterostructures obtained from Rietveld refinement pattern fitting                                      | S4-S5    |
| 5.      | <b>Figure S1</b>                 | N <sub>2</sub> -Adsorption-desorption isotherm of Ni/NiO.                                                                               | S5       |
| 6.      |                                  | Procedure for Electrochemical OER and HER Measurements                                                                                  | S6-S7    |
| 7.      | <b>Figure S2</b>                 | The area of the oxidation peak of Ni <sup>2+</sup> to Ni <sup>3+</sup> is considered for calculating the number of surface-active sites | S7       |
| 8.      | <b>Table S2</b>                  | The details of the electrochemical impedance spectra fittings                                                                           | S7       |

|            |                  |                                                                                                                                                           |            |
|------------|------------------|-----------------------------------------------------------------------------------------------------------------------------------------------------------|------------|
| <b>9.</b>  |                  | Determination of Turn Over Frequency (TOF)                                                                                                                | <b>S8</b>  |
| <b>10.</b> | <b>Table S3</b>  | Turn over frequency (TOF) of Ni/NiO for OER and HER                                                                                                       | <b>S9</b>  |
| <b>11.</b> | <b>Table S4</b>  | Comparison table of TOF values of NiO-based reported catalyst with the present Ni/NiO catalyst for OER                                                    | <b>S9</b>  |
| <b>12.</b> | <b>Figure S3</b> | PXRD pattern of Ni/NiO Heterostructure on carbon paper after OER and post HER stability test                                                              | <b>S10</b> |
| <b>13.</b> | <b>Figure S4</b> | (a-b) TEM, and HRTEM images of Ni/NiO after OER stability test                                                                                            | <b>S10</b> |
| <b>14.</b> | <b>Figure S5</b> | (a) XPS Survey spectra of post OER and post HER Ni/NiO heterostructures and the comparative peak fitted HRXPS spectra of (b) Ni 2p and (c) O 1s.          | <b>S11</b> |
| <b>15.</b> | <b>Table S5.</b> | Shows the comparative study of electrocatalytic performance of Ni/NiO nanostructures with metallic Ni and NiO <sub>x</sub> based catalyst for OER and HER | <b>S12</b> |
| <b>16.</b> |                  | References                                                                                                                                                | <b>S13</b> |

# 1. Mechanism of HER and OER

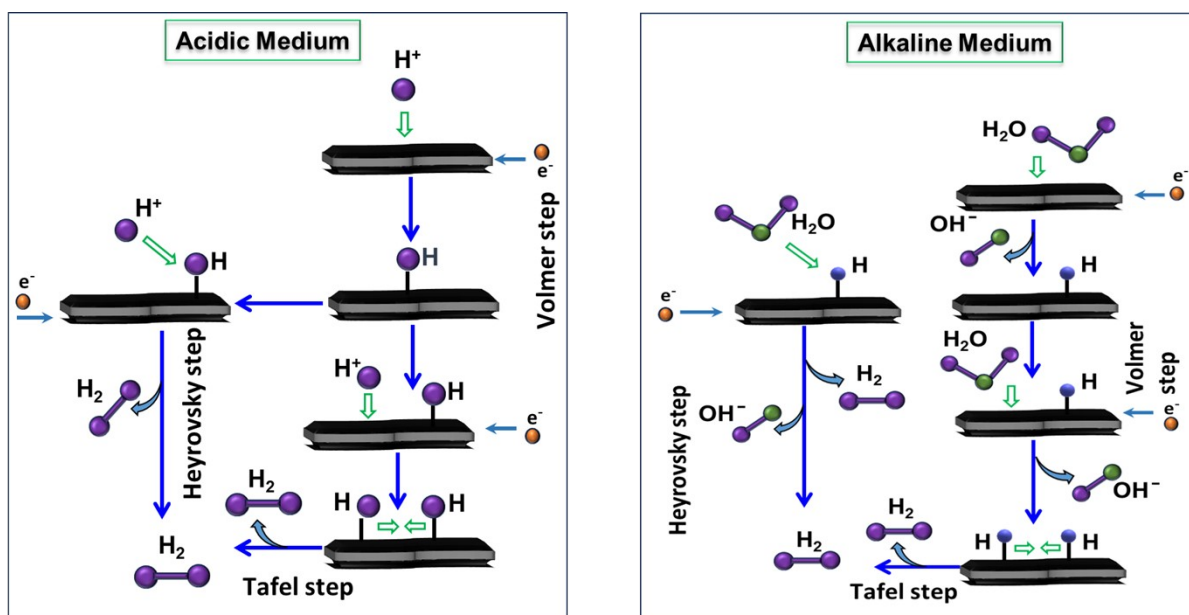

**Scheme S1.** Mechanism of Hydrogen Evolution Reaction (HER) in acidic and alkaline medium

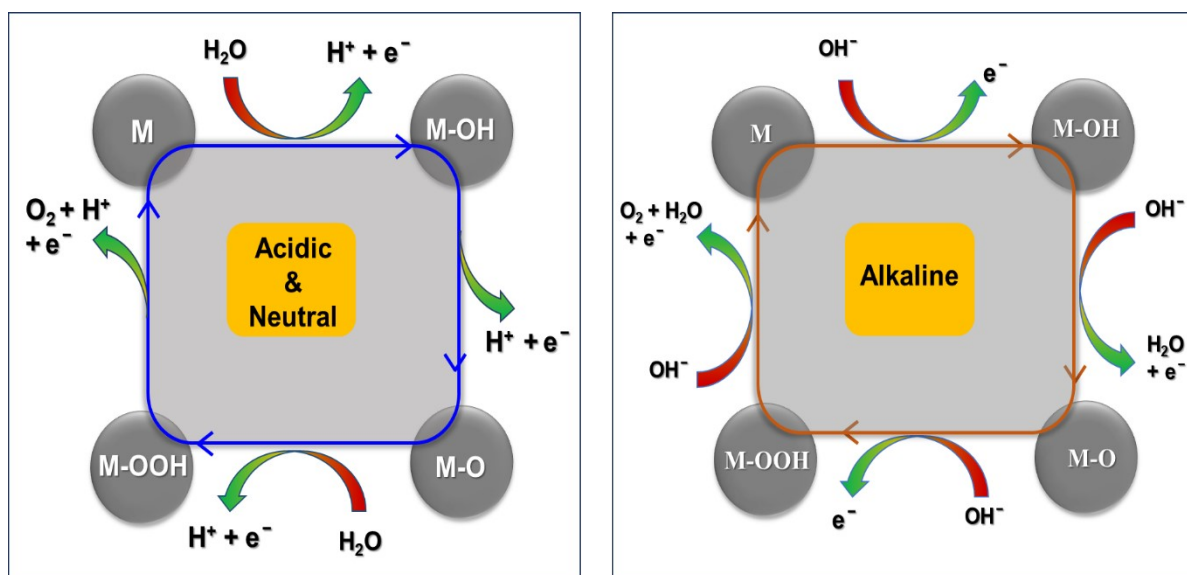

**Scheme S2.** Mechanism of Oxygen Evolution Reaction (OER) in acidic and alkaline medium

## 2. Characterisations:

The crystalline phase and structural integrity of the synthesized Ni/NiO heterostructures were recorded using a Rigaku X-ray diffractometer with Cu –  $\alpha$  source at a scan rate of  $4^\circ \text{ min}^{-1}$  with Cu  $K\alpha$  radiation ( $\lambda = 0.15406 \text{ nm}$ ) and step size of  $0.02^\circ$ . To gain deeper insight into the structural and morphological features of the material, high-resolution transmission electron microscopy (HRTEM) analysis was carried out by transmission electron microscopy (TEM) from Thermo Scientific, Themis S2300 G3 microscope (300 kV). For TEM analysis, a dilute dispersion of the sample in toluene was drop-cast onto a carbon-coated copper grid, followed by solvent evaporation under ambient conditions. Chemical states and electronic environments of Ni and O species were analysed by X-ray photoelectron spectroscopy (XPS) on Axis Supra spectrometer (Kratos Analytical) with a Monochromatic Al  $K\alpha$  source. Electrochemical measurements relevant to the hydrogen evolution reaction (HER) and oxygen evolution reaction (OER) were performed using a Metrohm Autolab Multichannel-204 electrochemical workstation controlled via Nova 2.1.4 software.

**Table S1.** Structural parameters of Ni/NiO heterostructures obtained from Rietveld refinement pattern fitting.

| Sample Composition                                                                                                                                                                                                                        | Phases          | Atoms | Oxidation state | Wyckoff notation | Positional coordinates<br>$x = y = z$ | $U_{\text{iso}}$ | Occupancy | Bond length (Å) & Bond Angles                     |
|-------------------------------------------------------------------------------------------------------------------------------------------------------------------------------------------------------------------------------------------|-----------------|-------|-----------------|------------------|---------------------------------------|------------------|-----------|---------------------------------------------------|
| Ni/NiO                                                                                                                                                                                                                                    | NiO<br>(70.51%) | Ni1   | $2^+$           | 4b               | 0.5000                                | 0.084            | 1.00      | Ni1–O1                                            |
|                                                                                                                                                                                                                                           |                 | O1    | $2^-$           | 4a               | 0.000                                 | 0.084            | 1.00      | =<br>2.09096<br>$\angle O1 - Ni1$<br>= $90^\circ$ |
| Crystal system = face-centered cubic, lattice parameters: $a = b = c = 4.18192 \text{ \AA}$ ; cell volume = $73.135322 \text{ \AA}^3$ , space group = Fm-3m (#225).<br>Bragg R Factors: $R_{\text{Bragg}} = 2.25$ , $R_{\text{F}} = 2.91$ |                 |       |                 |                  |                                       |                  |           |                                                   |

|                                                                                                                                                                                                                                                                                                                                                                                                                                                                  |     |   |    |        |       |      |  |
|------------------------------------------------------------------------------------------------------------------------------------------------------------------------------------------------------------------------------------------------------------------------------------------------------------------------------------------------------------------------------------------------------------------------------------------------------------------|-----|---|----|--------|-------|------|--|
| Ni<br>(29.49<br>%)                                                                                                                                                                                                                                                                                                                                                                                                                                               | Ni1 | 0 | 4a | 0.0000 | 0.145 | 1.00 |  |
| <p>Crystal system = face-centered cubic, lattice parameters: <math>a = b = c = 3.52631</math> Å; cell volume = <math>43.849178</math> Å<sup>3</sup>, space group = Fm-3m (#225).</p> <p>Bragg R Factors: <math>R_{\text{Bragg}} = 3.84</math>, <math>R_{\text{F}} = 11.2</math></p> <p>Conventional Rietveld R-Factors: <math>R_{\text{p}} = 30.2</math>, <math>R_{\text{wp}} = 18.3</math>, <math>R_{\text{exp}} = 18.16</math>, <math>\chi^2 = 1.02</math></p> |     |   |    |        |       |      |  |

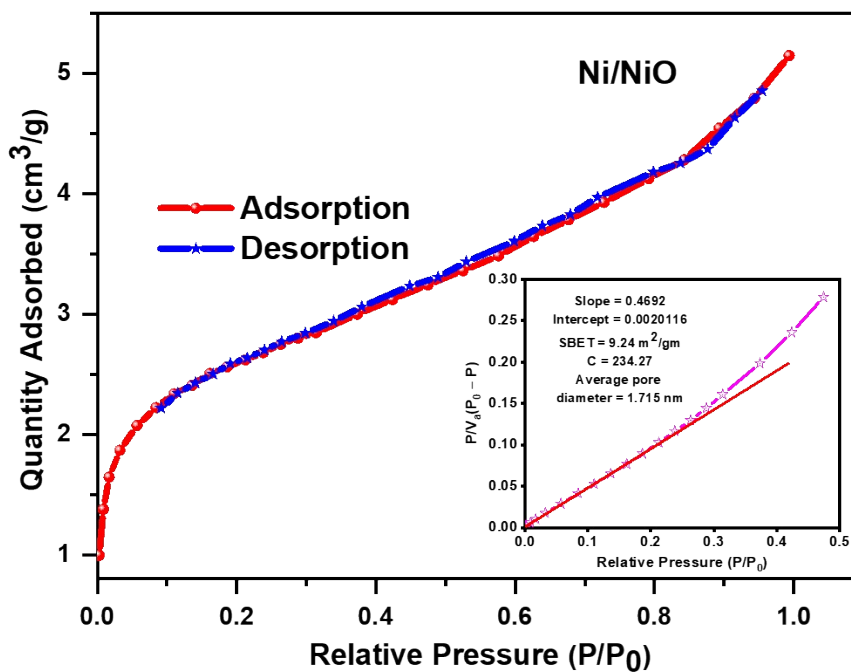

**Figure S1.** N<sub>2</sub>-Adsorption-desorption isotherm of Ni/NiO.

### 3. Procedure for Electrochemical OER and HER Measurements:

The electrochemical experiments were successfully carried out in a Metrohm Autolab (Multichannel-204) electrochemical station, that is coupled with the three-electrode system via

Nova 2.1.4 software. The as-prepared 30  $\mu\text{L}$  catalyst ink was drop-coated onto the carbon paper (Gas Diffusion Layer), which engaged as working electrode, Hg/HgO acted as reference whereas Pt wire and graphite rod worked as counter electrode for OER and HER measurements, respectively. The electrochemical activity was using 1 M KOH solution, prepared with double distilled water and degassed by 30 minutes Argon gas purging in the electrolyte for both OER and HER performance. Linear sweep voltammetry (LSV) with a scan rate of  $10 \text{ mV s}^{-1}$  and the potential window range of 0.1 to -1 V vs Hg/HgO in 1 M KOH electrolytic solution was used to record the polarisation curve for HER while the OER activity was measured in a potential window range of 0 V to 1.1 V vs. Hg/HgO with  $10 \text{ mV s}^{-1}$  scan rate in 1 M KOH electrolytic solution. Cyclic voltammetry (CV) studies had been conducted with scan rates ranging from 40 mV/s to 120 mV/s in 0.0 V to 0.20 V (vs. Hg/HgO) potential range in 1 M KOH solution. In 1 M KOH solution, electrochemical impedance spectroscopy (EIS) was conducted over the frequency range of 100 kHz to 0.1 Hz at a different applied overpotential for both OER and HER.

All the potentials were converted to RHE using the following Nernst equation for OER activities:<sup>1-3</sup>

$$E_{(\text{RHE})} = E_{\text{W vs. Hg/HgO}} + 0.059\text{pH} + E_{\text{Ref (Hg/HgO, 1 M KOH)}} \quad \text{----- (S1)}$$

Where,  $E_{\text{W}}$  represents the potential of working electrode.  $E_{\text{Ref}}$  indicates the potential the of the corresponding reference electrode.

The electrochemically active surface area (ECSA) is directly proportional to the electrochemical double layer capacitance ( $C_{\text{dl}}$ ) and it is calculated by applying below equation<sup>4</sup>:

$$\text{ECSA} = C_{\text{dl}}/C_{\text{s}} \quad \text{----- (S2)}$$

where  $C_{\text{s}}$  represents the specific capacitance of flat fabricated working electrode with a value of  $40 \mu\text{F cm}^{-2}$  per  $\text{cm}^2_{\text{ECSA}}$ . The double-layer capacitance ( $C_{\text{dl}}$ ) is calculated from the slope, of  $\Delta j$  vs. scan rate plot. Where,  $\Delta j$  represents the difference of  $J_{\text{a}}$  (anodic current density) or  $J_{\text{c}}$  (cathodic current density).

Further, the Tafel slope was determined from LSV curve using Tafel equation given below:

$$\eta = a + b \log j \quad \text{----- (S3)}^5$$

where  $a$  is the Tafel constant,  $b$  corresponds to the Tafel slope and  $j$  means the measured current density.

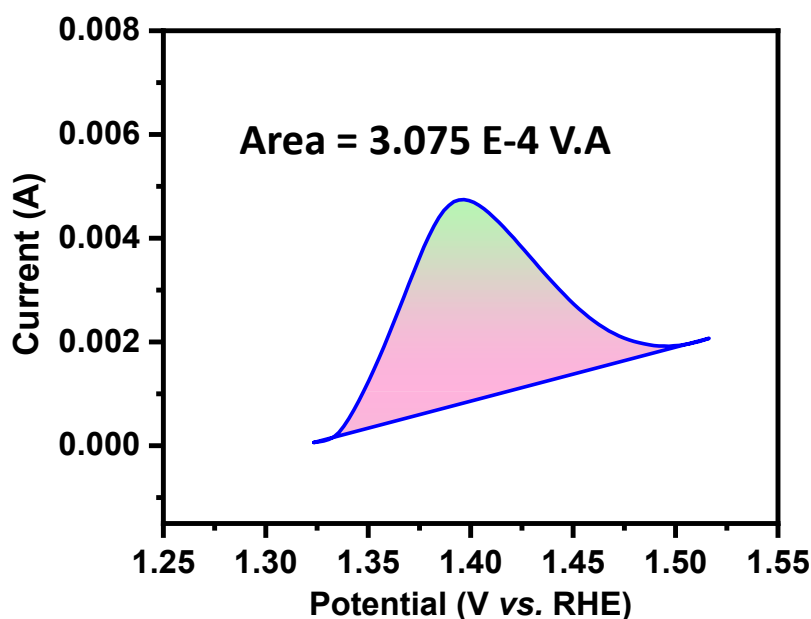

**Figure S2.** The area of the oxidation peak of  $\text{Ni}^{2+}$  to  $\text{Ni}^{3+}$  is considered for calculating the number of surface-active sites.

**Table S2.** The details of the electrochemical impedance spectra fittings are tabulated here.

| <b>EIS fitting details for OER:</b> |                               |                                  |                                 |                            |
|-------------------------------------|-------------------------------|----------------------------------|---------------------------------|----------------------------|
| <b>Applied overpotential (mV)</b>   | <b><math>R_s</math> (Ohm)</b> | <b><math>R_{ct}</math> (Ohm)</b> | <b>CPE (mMho.s<sup>n</sup>)</b> | <b><math>\chi^2</math></b> |
| 340                                 | 5.4                           | 12.7                             | 3.4 and 35.8                    | 0.03617                    |
| 370                                 | 5.5                           | 8.5                              | 3.1 and 30.6                    | 0.03092                    |
| 400                                 | 5.3                           | 6.6                              | 3.3 and 28.7                    | 0.03224                    |
| 430                                 | 5.4                           | 4.8                              | 3.2 and 27.5                    | 0.02540                    |
| 460                                 | 5.2                           | 3.6                              | 2.7 and 26.7                    | 0.02452                    |
| <b>EIS fitting details for HER:</b> |                               |                                  |                                 |                            |
| <b>Applied overpotential (mV)</b>   | <b><math>R_s</math> (Ohm)</b> | <b><math>R_{ct}</math> (Ohm)</b> | <b>CPE (mMho.s<sup>n</sup>)</b> | <b><math>\chi^2</math></b> |
| 440                                 | 5.8                           | 47.5                             | 36.4 and 155.8                  | 0.03754                    |
| 470                                 | 5.7                           | 29.3                             | 33.4 and 100.5                  | 0.03070                    |
| 500                                 | 5.8                           | 18.9                             | 32.1 and 75.2                   | 0.03261                    |
| 530                                 | 5.7                           | 8.5                              | 31.5 and 36.6                   | 0.02374                    |

#Note: mMho represents millisiemens (mS)

#### 4. Determination of Turn Over Frequency (TOF)

The TOF value for OER and HER experiments can be calculated as described in equation 6,<sup>7(1)</sup>

$$TOF = \frac{j N_A}{F n \Gamma} \text{ ----- (1)}$$

Where,

$j$  = current density ( $\text{mA cm}^{-2}$ ),  $N_A$  = Avogadro constant ( $6.0221 \times 10^{23} \text{ mole}^{-1}$ ),  $n$  is the number of electrons transferred = 4 for OER, 2 for HER, and  $\Gamma$  is the surface or total concentration of catalyst in terms of number of atoms.

The calculated area associated with the oxidation of  $\text{Ni}^{2+}$  to  $\text{Ni}^{3+}$  of both Compounds I and II, as depicted in Figure S2.

For **Ni/NiO**, the associated charge =  $(3.075 \times 10^{-4} \text{ V.A}) / 0.01 \text{ V s}^{-1}$

$$= 3.075 \times 10^{-2} \text{ A.s} = 3.075 \times 10^{-2} \text{ C.}$$

Now, the number of electron transferred =  $3.075 \times 10^{-2} \text{ C} / 1.602 \times 10^{-19} \text{ C} = 1.92 \times 10^{17}$

Since the oxidation of  $\text{Ni}^{2+}$  to  $\text{Ni}^{3+}$  is a single electron transfer reaction, the number of electrons calculated above is exactly the same as the number of surface-active sites for **Ni/NiO**.

TOF value of **Ni/NiO** at  $\eta = 350 \text{ mV}$  for OER:

$$TOF_{1.66 \text{ V}} = \frac{j N_A}{F n \Gamma} = \frac{7.92 \times 10^{-3} \text{ A cm}^{-2} \times (6.0221 \times 10^{23} \text{ atoms mole}^{-1})}{96485 \text{ s A mole}^{-1} \times 4 \times (1.92 \times 10^{17} \text{ atoms cm}^{-2})}$$

$$TOF_{1.66 \text{ V}} = 6.4 \times 10^{-2} \text{ s}^{-1}$$

TOF value of **Ni/NiO** at  $\eta = 430 \text{ mV}$  for HER:

$$TOF_{1.66 \text{ V}} = \frac{j N_A}{F n \Gamma} = \frac{9.22 \times 10^{-3} \text{ A cm}^{-2} \times (6.0221 \times 10^{23} \text{ atoms mole}^{-1})}{96485 \text{ s A mole}^{-1} \times 2 \times (1.92 \times 10^{17} \text{ atoms cm}^{-2})}$$

$$TOF_{1.66 \text{ V}} = 14.98 \times 10^{-2} \text{ s}^{-1}$$

**Table S3.** Turn over frequency (TOF) of Ni/NiO for OER and HER.

| Overpotentials (mV) for OER | TOF ( $\times 10^{-2} \text{ s}^{-1}$ ) for OER | Overpotentials (mV) for HER | TOF ( $\times 10^{-2} \text{ s}^{-1}$ ) for HER |
|-----------------------------|-------------------------------------------------|-----------------------------|-------------------------------------------------|
| 350                         | 6.4                                             | 430                         | 14.98                                           |
| 380                         | 10.47                                           | 460                         | 20.88                                           |
| 410                         | 14.83                                           | 490                         | 31.46                                           |
| 440                         | 20.48                                           | 520                         | 42.78                                           |
| 470                         | 26.55                                           | 550                         | 56.79                                           |
| 500                         | 37.36                                           | 580                         | 73.71                                           |

**Table S4.** Comparison table of TOF values of NiO-based reported catalyst with the present Ni/NiO catalyst for OER.

| Catalysts                       | TOF calculated at the following overpotential | TOF ( $\text{s}^{-1}$ ) | Reference        |
|---------------------------------|-----------------------------------------------|-------------------------|------------------|
| Fe-doped NiO                    | $\sim 300 \text{ mV}$ (0.1 M KOH)             | 0.05                    | 8                |
| Ni(OH) <sub>2</sub> nanoplates  | 490                                           | $0.21 \times 10^{-2}$   | 9                |
| Ni/NiO nanoparticles            | 320 (1.0 M KOH)                               | 0.11                    | 10               |
| NiO thinfilms                   | 0.5 M KOH 360 mV                              | 0.07                    | 11               |
| NiO hollow nanofibers           | 400 mV                                        | $3.9 \times 10^{-2}$    | 12               |
| Ni(OH) <sub>2</sub> nanospheres | 350 mV (0.1 M KOH)                            | 0.036                   | 13               |
| NiTi oxide nanosheets           | 500 mV (1 M KOH)                              | 0.068                   | 14               |
| Ni/NiO Composite                | 1 M KOH                                       | 0.064                   | <b>This work</b> |

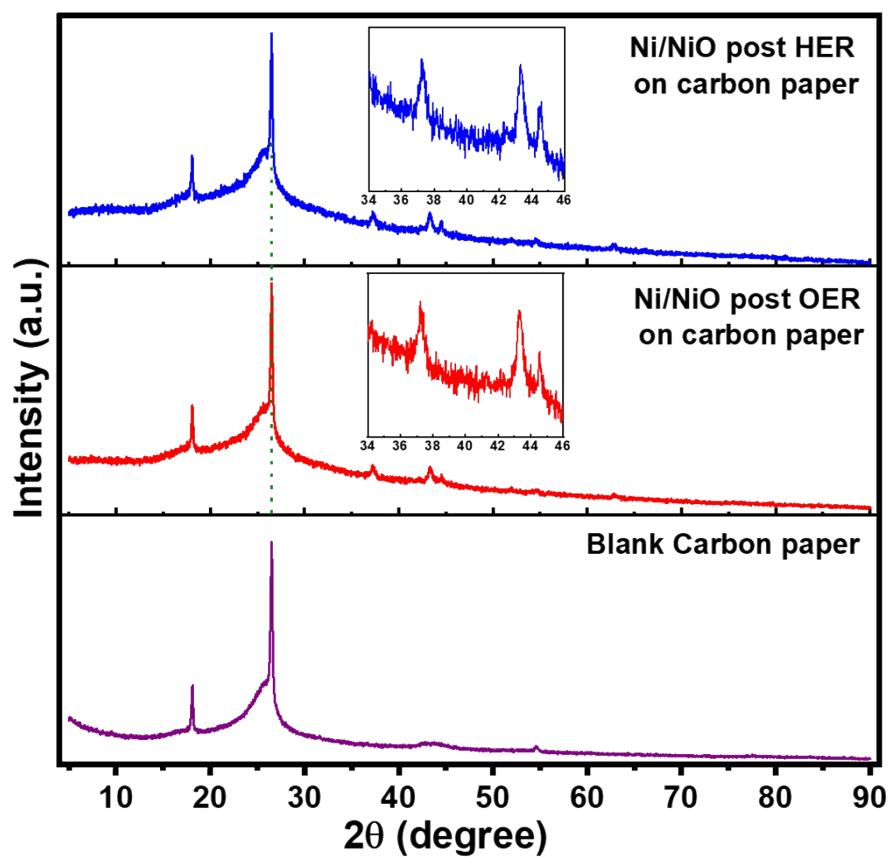

**Figure S3.** PXRD pattern of Ni/NiO Heterostructure on carbon paper after OER and post HER stability test.

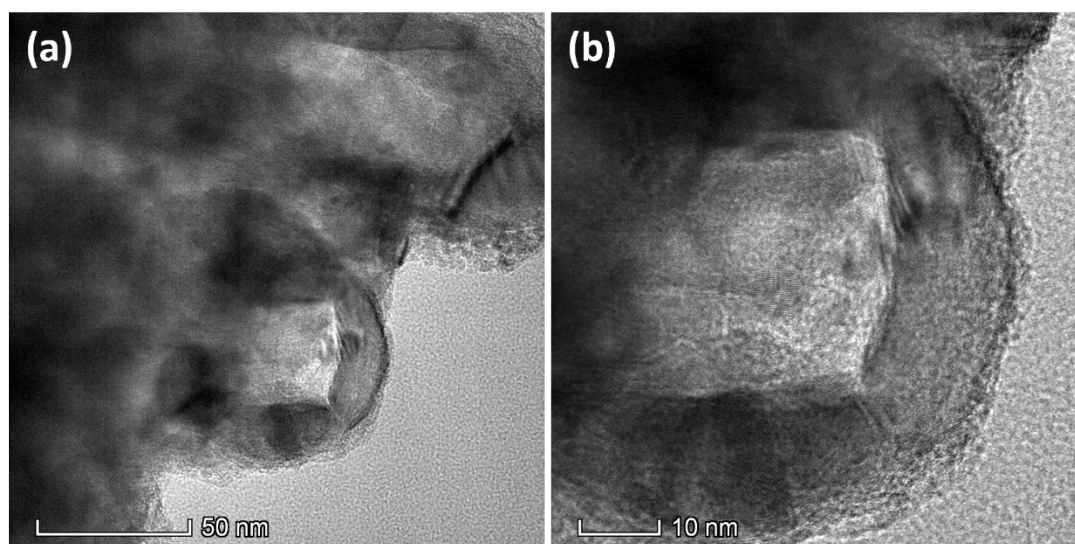

**Figure S4.** (a-b) TEM, and HRTEM images of Ni/NiO after OER stability test.

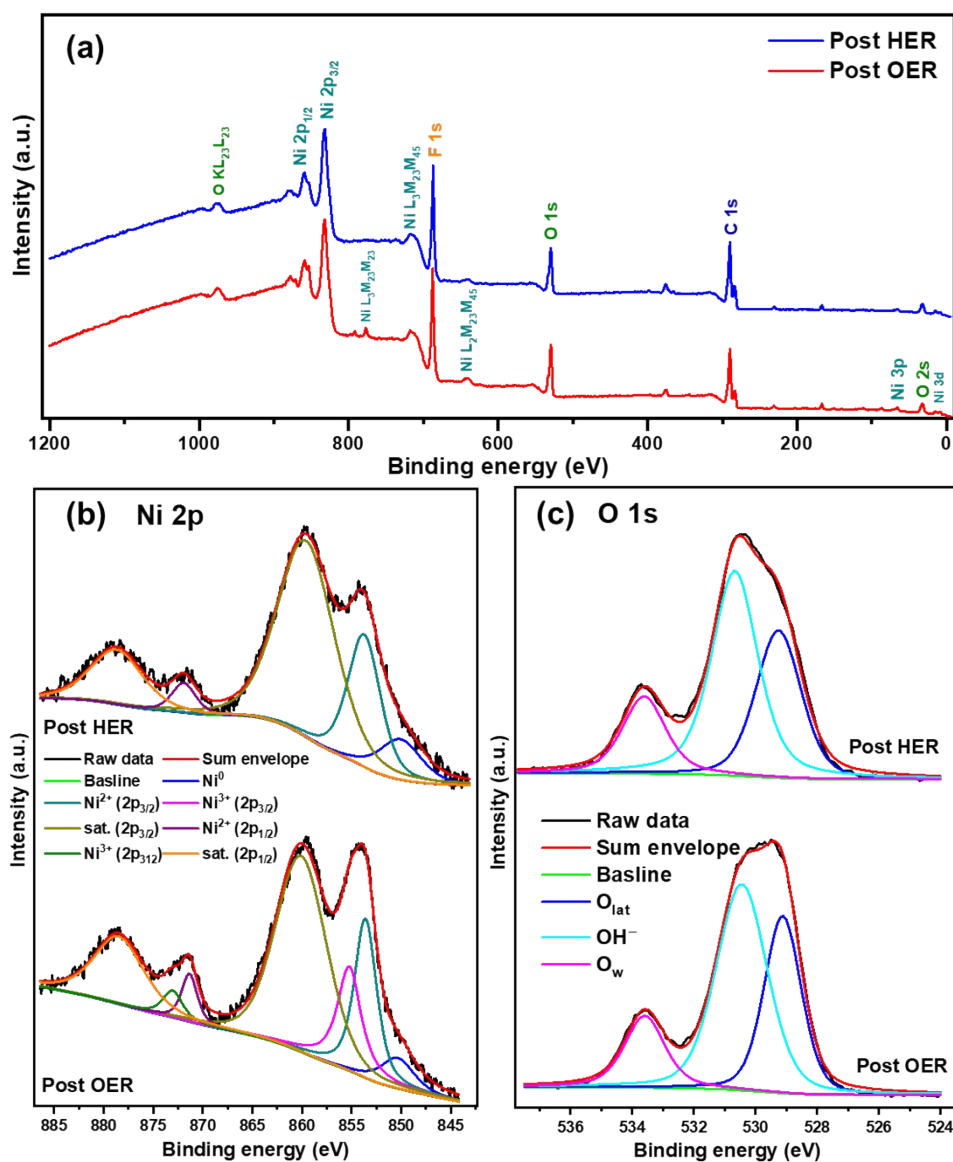

**Figure S5.** (a) XPS Survey spectra of post OER and post HER Ni/NiO heterostructures and the comparative peak fitted HRXPS spectra of (b) Ni 2p and (c) O 1s.

**Table S5.** Shows the comparative study of electrocatalytic performance of Ni/NiO nanostructures with metallic Ni and NiO<sub>x</sub> based catalyst for OER and HER

| Catalyst                                    | Overpotential (mV) @10 mA/cm <sup>2</sup> |     | Tafel Slope (mV/dec) |     | Electrolyte |                                      | Ref.             |
|---------------------------------------------|-------------------------------------------|-----|----------------------|-----|-------------|--------------------------------------|------------------|
|                                             | OER                                       | HER | OER                  | HER | OER         | HER                                  |                  |
| NiO@Ni/WS <sub>2</sub> /CC                  | 347 <sup>#</sup>                          | -   | 108.9                | -   | 1 M KOH     | -                                    | 15               |
| Ni/NiO <sub>x</sub> NPs                     | 432                                       | -   | 123                  | -   | 0.1 M KOH   | -                                    | 16               |
| NiO NA/CC (Nanosheet Array on Carbon Cloth) | 422                                       | -   | 116                  | -   | 1 M KOH     | 1 M KOH                              | 17               |
| Ni/NiO core-shell NWs on NF                 | 382                                       | 146 | 103                  | 72  | 1 M KOH     | 1 M KOH                              | 18               |
| NiO hollow microspheres (NiO-400)           | 470                                       | 498 | 188                  | 145 | 1 M KOH     | 1 M KOH                              | 19               |
| NiO <sub>x</sub> /Ni                        | 390                                       | -   | ~69                  | -   | 1 M KOH     | -                                    | 20               |
| Carbon-Anchored NiO Nanotablets             | 320                                       | -   | 49                   | -   | 1 M KOH     | -                                    | 21               |
| NiO nanoparticles/GO                        | 625                                       | 453 | 168                  | 128 | 1 M KOH     | 1 M KOH                              | 22               |
| 2D porous NiO nanoplates                    | 476                                       | 384 | 136                  | 326 | 1 M KOH     | 0.5 M H <sub>2</sub> SO <sub>4</sub> | 23               |
| 0D NiO nanoparticles                        | 373                                       | 268 | 139                  | 201 | 1 M KOH     | 0.5 M H <sub>2</sub> SO <sub>4</sub> | 23               |
| Ni/NiO                                      | 363                                       | 437 | 182                  | 182 | 1 M KOH     | 1 M KOH                              | <b>This Work</b> |

<sup>#</sup> = at 50 mA/cm<sup>2</sup>

## References:

1. T. Rom, R. Biswas, K.K. Haldar, S. Sarkar, U. Saha and A.K. Paul, *Inorg. Chem.* **2021**, *60* (20), 15106-15111.
2. M. Jiang, H. Zhai, L. Chen, L. Mei, P. Tan, K. Yang and J. Pan, *Adv. Funct. Mater.* **2023**, *33* (33), 2302621.
3. S.S. Sankar, A. Rathishkumar, K. Geetha and S. Kundu, *Energy Fuels* **2020**, *34* (10), 12891-12899.
4. C.C. McCrory, S. Jung, J.C. Peters and T.F. Jaramillo, *Chem. Soc.* **2013**, *135* (45), 16977-16987.
5. P. Mani, A. Sheelam, P.E. Karthik, R. Sankar, K. Ramanujam and S. Mandal, *ACS Appl. Energy Mater.* **2020**, *3* (7), 6408-6415.
6. N. Seal, A. Karmakar, S. Kundu and S. Neogi, *ACS Sustainable Chem. Eng.* **2022**, *11* (3), 979-993.
7. K. Karthick, S. Anantharaj, P.E. Karthik, B. Subramanian and S. Kundu, *Inorg. Chem.* **2017**, *56* (11), 6734-6745.
8. R.R. Rao, S. Corby, A. Bucci, M. García-Tecedor, C.A. Mesa, J. Rossmeisl, S. Giménez, J. Lloret-Fillol, I.E. Stephens and J.R. Durrant, *J. Am. Chem. Soc.* **2022**, *144* (17), 7622-7633.
9. X. Zhou, Z. Xia, Z. Zhang, Y. Ma and Y. Qu, *J. Mater. Chem. A* **2014**, *2* (30), 11799-11806.
10. F.E. Sarac Oztuna, T. Beyazay and U. Unal, *J. Phys. Chem. C* **2019**, *123* (46), 28131-28141.
11. A.C. Pebley, E. Decolvenaere, T.M. Pollock and M.J. Gordon, *Nanoscale* **2017**, *9* (39), 15070-15082.
12. V.D. Silva, T.A. Simões, J.P. Grilo, E.S. Medeiros and D.A. Macedo, *J. Mater. Sci.* **2020**, *55* (15), 6648-6659.
13. M. Gao, W. Sheng, Z. Zhuang, Q. Fang, S. Gu, J. Jiang and Y. Yan, *J. Am. Chem. Soc.* **2014**, *136* (19), 7077-7084.
14. Y. Zhao, X. Jia, G. Chen, L. Shang, G.I. Waterhouse, L.Z. Wu, C.H. Tung, D. O'Hare and T. Zhang, *J. Am. Chem. Soc.* **2016**, *138* (20), 6517-6524.
15. D. Wang, Q. Li, . Han, Z. Xing and X. Yang, *ACS Cent. Sci.* **2018**, *4* (1), 112-119.
16. B. Li, S.W. Chien, X. Ge, J. Chai, X.Y. Goh, K.T. Nai, T.A. Hor, Z. Liu and Y. Zong, *Mater. Chem. Front.* **2017**, *1* (4), 677-682.
17. N. Cheng, Q. Liu, J. Tian, X. Sun, Y. He, S. Zhai and A.M. Asiri, *Int. J. Hydrogen Energy* **2015**, *40* (32), 9866-9871.
18. H. Sun, Z. Ma, Y. Qiu, H. Liu and G.G. Gao, *Small* **2018**, *14* (31), 1800294.
19. A. Mondal, A. Paul, D.N. Srivastava and A.B. Panda, *Int. J. Hydrogen Energy* **2018**, *43* (47), 21665-21674.
20. G.Q. Han, Y.R. Liu, W.H. Hu, B. Dong, X. Li, X. Shang, Y.M. Chai, Y.Q. Liu and C.G. Liu, *Appl. Surf. Sci.* **2015**, *359*, 172-176.
21. S. Sekar, D.Y. Kim and S. Lee, *Nanomaterials* **2020**, *10* (7), 1382.
22. S.G. Jo, C.S. Kim, S.J. Kim and J.W. Lee, *Nanomaterials* **2021**, *11* (12), 3379.
23. V. Manjunath, S. Bimli, R. Biswas, P.N. Didwal, K.K. Haldar, M. Mahajan, N.G. Deshpande, P.A. Bhoje and R.S. Devan, *Int. J. Hydrogen Energy* **2022**, *47* (92), 39018-39029.
